# Supplementary material
Source: Research Square preprint supplement (doi:10.21203/rs.3.rs-9462068/v1)
Supplement: Supplementary file 1 [file 7da4903a434691bd34e7ac2c.docx]

## Table 3: Factors associated with occupational injuries among factory workers

| **Variable** | | **Prevalence of occupational injuries** | | | | **COR (95%CI)** | **AOR (95% CI )** | **P-value** |
| --- | --- | --- | --- | --- | --- | --- | --- | --- |
|  | | **Yes 185 (29.7%)** | | **No 438**  **(70.3%)** | |  |  |  |
|  | | **Individual factors** | | | | |  |  |
| **Age (years)** | |  | |  | |  |  |  |
| <25 | | 26(25.7) | | 75(74.3) | |  |  |  |
| 25-30 | | 110(39.3) | | 170(60.7) | | 0.87(0.12-0.91) | 0.13(0.01-8.12) | 0.09 |
| 31-40 | | 25(25.5) | | 73(74.5) | | 0.99(0.52-1.86) | 1.48(0.46-4.77) | 0.51 |
| >40 | | 13(12.2) | | 94(87.8) | | 0.39(0.19-0.83) | 0.37(0.05-0.81) | **0.003*** |
| **Education level** | |  | |  | |  |  |  |
| Primary | | 19(19.2) | | 80(80.8) | |  |  |  |
| Secondary | | 101(52.3) | | 92(47.7) | | 0.62(0.12-0.91) | 0.64(0.18-0.90) | **0.04*** |
| No education | | 15(27.8) | | 39(72.2) | | 1.62(0.74-3.52) | 2.83(0.77-10.31) | 0.12 |
| Tertiary | | 39(16.4) | | 199(83.6) | | 0.83(0.45-1.51) | 0.81(0.28-2.37) | 0.71 |
| **Marital status** | |  | |  | |  |  |  |
| Divorced | | 17(20.2) | | 67(79.8) | |  |  |  |
| Married | | 43(20.4) | | 168(79.6) | | 1.01(0.54-1.89) | 1.01(0.39-3.05) | 0.86 |
| Single | | 110(40.1) | | 164(59.9) | | 2.64(1.47-4.74) | 2.34(0.80-6.80) | 0.12 |
| Widowed | | 3(18.7) | | 13(81.3) | | 0.91(0.23-3.55) | 1.56(0.20-11.99) | 0.67 |
| **Sex** | |  | |  | |  |  |  |
| Female | | 31(19.6) | | 127(80.4) | |  |  |  |
| Male | | 143(33.7) | | 281(66.3) | | 2.08(1.34-3.24) | 0.70(0.30-1.60) | 0.40 |
| **Friend suffered injury** | |  | |  | |  |  |  |
| No | | 27(10.5) | | 230(89.5) | |  |  |  |
| Yes | | 146(45.2) | | 177(54.8) | | 7.03(4.46-11.07) | 2.87(1.16-7.11) | **0.02*** |
| **Friend died from injury** | |  | |  | |  |  |  |
| No | | 52(16.7) | | 260(83.3) | |  |  |  |
| Yes | | 121(44.8) | | 149(55.2) | | 4.06(2.77-5.95) | 0.87(0.34-2.22) | 0.78 |
| **Job category** | |  | |  | |  |  |  |
| Manual labourers | | 152(36.0) | | 270(64.0) | |  |  |  |
| Office workers | | 20(12.7) | | 137(87.3) | | 0.26(0.16-0.43) | 0.48(0.19-1.26) | 0.14 |
| **Had a disability** | |  | |  | |  |  |  |
| No | | 119(24.4) | | 368(75.6) | |  |  |  |
| Yes | | 53(56.4) | | 41(43.6) | | 3.99(2.53-6.31) | 3.45(1.49-7.99) | **0.004*** |
| **Job stress** | |  | |  | |  |  |  |
| No | | 56(18.2) | | 251(81.8) | |  |  |  |
| Yes | | 102(39.5) | | 156(60.5) | | 2.93(1.99-4.29) | 0.72(0.31-1.67) | 0.45 |
| **Duration in current workplace (months)** | |  | |  | |  |  |  |
| <6 | | 24(19.8) | | 97(80.2) | |  |  |  |
| 6-12 | | 29(19.9) | | 117(80.1) | | 1.00(0.55-1.83) | 1.42(0.44-4.56) | 0.56 |
| >12 | | 120(38.2) | | 194(61.8) | | 2.49(1.51-4.13) | 0.18(0.06-0.86) | **0.02*** |
| **Undergone OSH training** | |  | |  | |  |  |  |
| No | | 32(13.8) | | 199(86.2) | |  |  |  |
| Yes | | 140(40.2) | | 208(59.8) | | 4.19(2.72-6.44) | 1.70(0.72-4.00) | 0.23 |
| **Experienced sleeping disturbances** | |  | |  | |  |  |  |
| No | | 55(14.1) | | 334(85.9) | |  |  |  |
| Yes | | 118(61.8) | | 73(38.2) | | 9.82(6.53-14.76) | 5.01(2.31-10.84) | **0.000*** |
| **Complied to factory SOP guidelines** | |  | |  | |  |  |  |
| Yes | | 24(18.0) | | 109(82.0) | |  |  |  |
| No | | 129(34.6) | | 244(65.4) | | 0.44(0.28-0.70) | 2.35(0.83-6.61) | 0.11 |
| **Worked shifts at workplace** | |  | |  | |  |  |  |
| No | | 17(10.6) | | 144(89.4) | |  |  |  |
| Yes | | 155(37.3) | | 260(62.7) | | 5.05(2.94-8.67) | 1.91(0.61-5.99) | 0.27 |
| **Sometimes slept at work** | |  | |  | |  |  |  |
| No | | 32(13.1) | | 212(86.9) | |  |  |  |
| Yes | | 140(42.0) | | 193(56.0) | | 4.81(3.12-7.39) | 2.72(1.76-7.46) | **0.04*** |
| **Work place factors associated with injuries** | | | | | | | | |
| **Factory trained employees on OSH** |  | |  | |  | |  |  |
| No | 24(16.5) | | 121(83.5) | |  | |  |  |
| Yes | 147(34.1) | | 284(65.9) | | 2.61(1.61-4.22) | | 1.05(0.36-3.08) | 0.92 |
| **Factory hadguidelines on OSH** |  | |  | |  | |  |  |
| No | 24(18.0) | | 109(82.0) | |  | |  |  |
| Yes | 129(34.6) | | 244(65.4) | | 0.40(0.07-0.92) | | 0.78(0.25-0.81) | **0.01*** |
| **Experienced many vibrations** |  | |  | |  | |  |  |
| No | 33(16.1) | | 172(83.9) | |  | |  |  |
| Yes | 120(39.3) | | 185(60.7) | | 3.38(2.18-5.24) | | 0.79(0.32-2.01) | 0.63 |
| **Provided PPE to workers** |  | |  | |  | |  |  |
| No | 8(15.7) | | 43(84.3) | |  | |  |  |
| Yes | 145(31.6) | | 314(68.4) | | 0.17(0.07-6.70) | | 0.57(0.51-0.91) | **0.03*** |
|  |  | |  | |  | |  |  |
| **Workplace had many light rays** |  | |  | |  | |  |  |
| No | 24(13.0) | | 160(87.0) | |  | |  |  |
| Yes | 127(39.1) | | 198(61.9) | | 4.31(2.65-6.99) | | 0.63(0.19-2.02) | 0.44 |
| **PPE fittedappropriately** |  | |  | |  | |  |  |
| No | 24(16.4) | | 122(83.6) | |  | |  |  |
| Yes | 128(35.6) | | 231(64.4) | | 3.50(1.59-7.72) | | 0.71(0.19-2.51) | 0.59 |
|  |  | |  | |  | |  |  |
| **Work place was well ventilated** |  | |  | |  | |  |  |
| No | 23(14.2) | | 139(85.8) | |  | |  |  |
| Yes | 130(37.6) | | 216(62.4) | | 0.97(0.44-2.12) | | 0.62(0.21-1.89) | 0.45 |
|  |  | |  | |  | |  |  |
| **Always under constant supervision** |  | |  | |  | |  |  |
| No | 40(12.3) | | 64(87.7) | |  | |  |  |
| Yes | 113(17.0) | | 151(83.0) | | 2.82(1.73-4.58) | | 0.56(0.19-1.64) | 0.29 |
| **A lot of noise at work place** |  | |  | |  | |  |  |
| No | 17(17.7) | | 79(82.3) | |  | |  |  |
| Yes | 136(32.8) | | 279(67.2) | | 0.63(0.22-0.94) | | 3.82(1.32-4.91) | **0.001*** |
| **Medical examination** |  | |  | |  | |  |  |
| No | 41(13.2) | | 270(86.8) | |  | |  |  |
| Yes | 110(55.6) | | 88(44.4) | | 0.62(0.08-0.97) | | 0.71(0.19-0.98) | **0.04*** |
| **Aerosols at work place** |  | |  | |  | |  |  |
| No | 19(10.1) | | 169(89.9) | |  | |  |  |
| Yes | 131(41.8) | | 182(58.2) | | 6.40(3.79-10.82) | | 2.54(0.82-7.86) | 0.11 |
| **Smoke generated at workplace** |  | |  | |  | |  |  |
| No | 15(13.6) | | 95(86.4) | |  | |  |  |
| Sometimes | 28(15.2) | | 156(84.8) | | 1.14(0.58-2.24) | | 1.38(0.44-4.27) | 0.58 |
| Yes | 110(50.9) | | 106(49.1) | | 6.57(3.58-12.05) | | 1.56(0.50-4.87) | 0.44 |
| **Heat generated at work place** |  | |  | |  | |  |  |
| No | 26(12.9) | | 176(87.1) | |  | |  |  |
| Yes | 126(41.0) | | 181(59.0) | | 4.71(2.94-7.54) | | 1.51(0.63-3.62) | 0.35 |
| **Height of cooking surface (meters)** |  | |  | |  | |  |  |
| <1 | 19(16.8) | | 94(83.2) | |  | |  |  |
| >1 | 133(33.7) | | 262(66.3) | | 2.51(1.47-4.29) | | 1.36(0.59-3.11) | 0.46 |

***Statistically significant; P<0.05, the independent variable is significantly associated with the outcome.**
